# Supplementary material for: Rationally designed nanosheet-based CoMoO4–NiMoO4 nanotubes for high-performance electrochemical electrodes
Source: Royal Society of Chemistry journal article supplement (doi:10.1039/c5ra27401j), 2016-01-01
Supplement: c5ra27401j1.pdf [file c5ra27401j1.pdf]

**Electronic Supplementary Information (ESI)**

**Rationally designed nanosheet-based CoMoO<sub>4</sub>-NiMoO<sub>4</sub> nanotubes  
for high-performance electrochemical electrodes**

Qing Yang, Shuang-Yan Lin\*

\*Corresponding author email: [linshyan123@163.com](mailto:linshyan123@163.com)

<sup>a</sup> Key Laboratory for Photonic and Electronic Bandgap Materials, Ministry of Education, School of Physics and Electronic Engineering, Harbin Normal University, Harbin 150025, P. R. China.

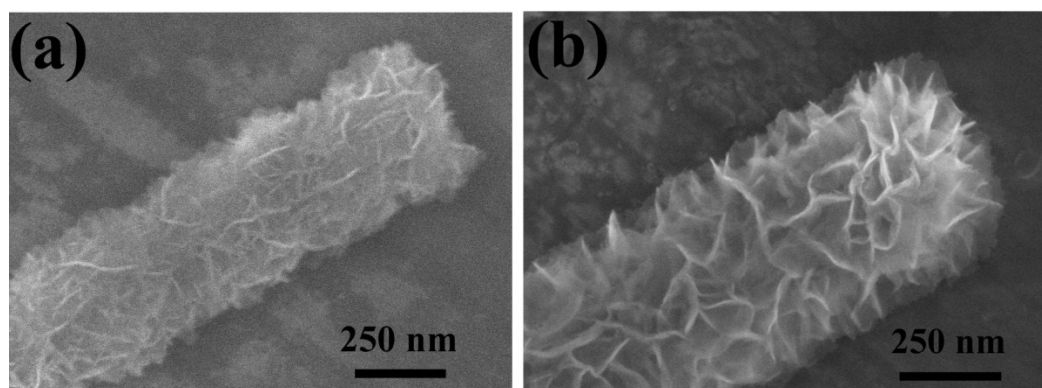

Fig. S1 (a) SEM image of  $\text{CoMoO}_4$  NTs. (b) SEM image of  $\text{NiMoO}_4$  NTs.

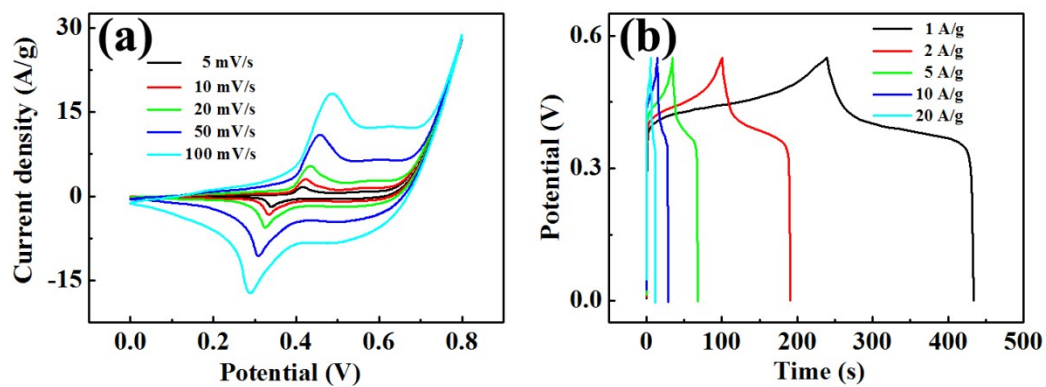

Fig. S2 (a) CV curves of the  $\text{CoMoO}_4$  composite electrodes at different scan rates ranging from 5 to  $100 \text{ mV s}^{-1}$  in 3 M KOH aqueous solution. (b) Galvanostatic charge/discharge curves of the  $\text{CoMoO}_4$  composite electrodes collected at different current densities from 1 A/g to 20 A/g.

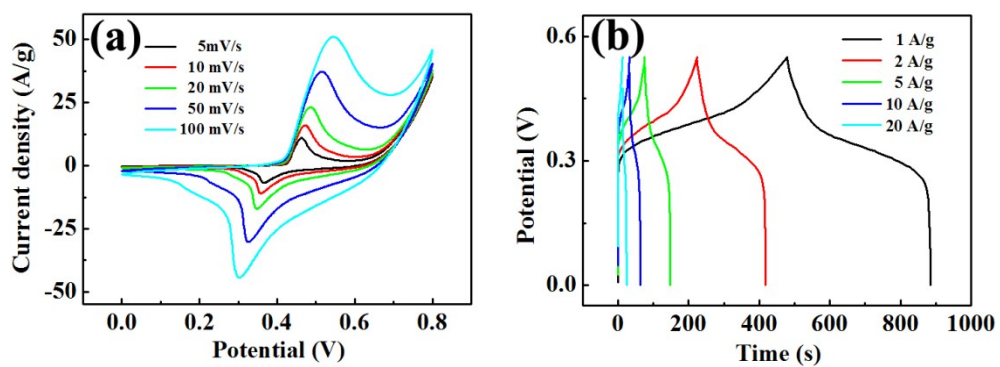

Fig. S3 (a) CV curves of the NiMoO<sub>4</sub> composite electrodes at different scan rates ranging from 5 to 100 mV s<sup>-1</sup> in 3 M KOH aqueous solution. (b) Galvanostatic charge/discharge curves of the NiMoO<sub>4</sub> composite electrodes collected at different current densities from 1 A/g to 20 A/g.
